# Supplementary material
Source: PubMed Central journal article supplement (PMC8529289)
Supplement: mmc2.pdf [file mmc2.pdf]

# Covid

---

Record ID

\_\_\_\_\_

## Patient Info

PLEASE MAKE SURE THIS IS A CORNELL/LMH PATIENT

---

Name of Reviewer

\_\_\_\_\_

---

Patient MRN

\_\_\_\_\_

---

Patient EMPI

\_\_\_\_\_

---

Date of Birth (MM/DD/YYYY)

\_\_\_\_\_

---

Sex

Male  
 Female

---

Today's Date

\_\_\_\_\_

---

BMI (kg/m<sup>2</sup>)

\_\_\_\_\_

---

Race

White  
 Black  
 Asian  
 Other  
 Not Specified

## Co-morbidities

---

CAD (Coronary Artery Disease)

No  
 Yes

---

Heart Failure

No  
 HFpEF  
 HFrEF (EF < 50%)  
 Unspecified HF

---

CVA (Stroke)

No  
 Yes

---

Diabetes Mellitus (DMI, DMII)

No  
 Yes

---

HTN (Hypertension)

No  
 Yes

Does the patient require non-invasive home O2 at baseline?

- No  
 Nasal Cannula (oxygen tank/concentrator)  
 CPAP  
 BIPAP  
 (Prior to ED presentation)

Does the patient require invasive mechanical ventilation at baseline?

- No  
 Yes  
 (Does NOT include CPAP/BIPAP)

Pulmonary Disease

- No  
 COPD  
 Asthma  
 Interstitial Lung Disease  
 Obstructive Sleep Apnea  
 Other  
 (Select all that apply)

Other:

\_\_\_\_\_

Renal Disease

- No  
 CKD (Creat >2 at baseline)  
 ESRD

Cirrhosis

- No  
 Yes

Does the patient have a history of chronic Hep B or Hep C?

- No  
 Hepatitis B  
 Hepatitis C

HIV

- No  
 Yes

What is the patient's HIV regimen?

- Not on Medication  
 Regimen includes Protease Inhibitors  
 Regimen does not include Protease Inhibitors  
 ((all protease inhibitors end with "-navir"; however, please note that integrase inhibitors end with "-avir"))

What was their most recent CD4 count (cells/mm<sup>3</sup>)?

\_\_\_\_\_

What was their most recent viral load (copies/mL)?

\_\_\_\_\_ (If "Undetected", put "0" )

CD4 < 200 and/or Viral Load > 1,000

- No  
 Yes  
 (As documented in admission note)

Active Cancer (excluding non-melanoma skin cancer)

- No  
 Solid  
 Liquid  
 (Receiving cancer therapy, diagnosed within 6 months, recurrent or metastatic)

Specify:

---

History of Transplant

- No  
 Bone Marrow Transplant (BMT)  
 Kidney (DDKT, LRRT, LURT)  
 Liver (LDLT, DDLT, OLT)  
 Other
- 

Other:

---

Inflammatory Bowel Disease

- No  
 Yes
- 

Rheumatologic Disease

- No  
 Rheumatoid Arthritis (RA)  
 Lupus (SLE)  
 Other
- 

Other:

---

Current Pregnancy

- No  
 Yes  
 (If male, select No)
- 

What is the gestational age?

\_\_\_\_\_

(Round to closest week)

---

Other Immunosuppressed State

- No  
 Yes  
 (Chemotherapy or radiotherapy (XRT) within last 6 months; inherited immunodeficiency)
- 

Which immunosuppressed state? (Within last 6 months for chemo/radiation)

- Chemotherapy  
 Radiotherapy (XRT)  
 Inherited immunodeficiency
- 

## Symptoms

Is there an exact date of first symptoms?

- No  
 Yes
- 

Date of First Symptoms (MM/DD/YYYY)

\_\_\_\_\_

---

Enter timeframe "term" used

\_\_\_\_\_  
 ((ie "a couple days", "last week", "2-3 weeks ago"))

---

Did the patient receive healthcare for their presenting symptoms before this ED presentation?

- No  
 Yes  
 (ie office visit, phone call, etc)
-

Within the last week, was the patient discharged from an ED or hospital for these symptoms?

- No  
 Yes

Is there an exact date of first healthcare contact?

- No  
 Yes

Date of First Contact with Healthcare (MM/DD/YYYY)

\_\_\_\_\_

Enter timeframe "term" used

\_\_\_\_\_  
 ((ie "a couple days", "last week", "2-3 weeks ago"))

Smoking Status

- No  
 Active Smoker  
 Former Smoker  
 (Search in iNYP: tobacco, smoker, smoking)

Vaping Status

- No  
 Yes

Recent Travel (within 14 days of symptom onset)

- No  
 Yes, Domestic  
 Yes, International

Location:

\_\_\_\_\_  
 (For Domestic: specify city and state (format: San Francisco, CA) | For International: specify country)

Did the patient have any confirmed COVID positive contacts?

- No  
 Yes

Symptoms

- Fever  
 Cough  
 Dyspnea  
 Sore throat  
 Rhinorrhea or nasal congestion  
 Conjunctival congestion  
 Headache  
 Myalgias  
 Nausea or vomiting  
 Diarrhea  
 Sputum production  
 Presyncope or Syncope  
 Chest Pain (includes "tightness" and "pressure")  
 Abdominal Pain  
 Altered Mental Status (includes "confusion")  
 Anosmia (loss of smell)  
 Ageusia (loss of taste)  
 Other

Other:

\_\_\_\_\_  
 (Please only include major symptoms)

**Home Medications**

Use of ACEi or ARB

- No  
 Yes  
 (ACEi: "-pril" | ARB: "-sartan")

Use of NSAIDs

- No  
 Yes  
 ( aspirin, celecoxib, diclofenac, diflunisal, etodolac, ibuprofen, indomethacin, ketoprofen, ketorolac, meloxicam, nabumetone, naproxen, oxaprozin, piroxican, salsalate, sulindac, tolmetin)

Use of PPIs

- No  
 Yes  
 (Omeprazole, Pantoprazole, "-prazole")

Use of Steroids

- No  
 Nasal  
 Inhaled  
 Oral  
 (Prednisone, Budesonide, Fluticasone)

Use of oseltamivir (Tamiflu)

- No  
 Yes

Use of Antivirals (excluding oseltamivir and HIV treatment)

- No  
 Yes

Use of Statins

- No  
 Yes

Use of hydroxychloroquine/Plaquenil (for treatment of RA, SLE, etc)

- No  
 Yes

Use of Immunosuppressive Medication (within last 30 days)

- None  
 Prednisone less than 20mg/day  
 Prednisone at least 20mg/day  
 TNF-alpha inhibitor  
 Other monoclonal antibody  
 Tacrolimus  
 Cyclosporine  
 MTOR inhibitor (sirolimus, everolimus)  
 Mycophenolate (MMF, myfortic)  
 Azathioprine  
 Methotrexate  
 Other

Other:

Total Count of Home Medications (excluding over-the-counter medications)

\_\_\_\_\_

(For NSAIDs, only include if prescribed (No OTC NSAIDs))

**ED Course**

Are they a healthcare worker?

- No  
 Yes  
 (Active healthcare worker only)

Did the patient require supplemental oxygen within the first 3 hours of arrival?

- No  
 Yes

What was the highest level of supplemental oxygen required (within first 3 hours)?

- Nasal Cannula  
 Venti mask  
 High flow nasal cannula  
 Non-rebreather  
 NIV (BIPAP, CPAP)  
 Mechanical Ventilation

Date of ED/Hospital Arrival (MM/DD/YYYY)

\_\_\_\_\_

Time of ED/Hospital Arrival (24 HH:MM)

\_\_\_\_\_

(Military time)

Where were they admitted from?

- Home  
 Rehab/Nursing Home  
 Other Hospital  
 Undomiciled  
 Prison  
 Other

Other:

\_\_\_\_\_

**Mechanical Ventilation**

Did the patient require non-invasive mechanical ventilation?

- No  
 Yes  
 (ie BIPAP, CPAP, proportional assist ventilation (PAV))

Was patient intubated at any point

- No  
 Yes  
 (Please also search "intubated" and "intubation" in iNYP to double check)

Intubation Date (MM/DD/YYYY)

\_\_\_\_\_

Intubation Time (24 HH:MM)

\_\_\_\_\_

(Military time)

Was the patient intubated in the ED?

- No  
 Yes  
 Unknown

---

Where was the patient primarily managed while ventilated?

(Format: If Cornell: G5N, B17 | If LMH: LMH2S, LMH5C |If Queens: Q5W, QMICU)

---

Did the patient receive a new tracheostomy during this hospitalization?

- No
- Yes

---

Date of tracheostomy

\_\_\_\_\_

---

Was the patient extubated?

- No
- Yes

---

Extubation Date (MM/DD/YYYY)

\_\_\_\_\_

---

Extubation Time (24 HH:MM)

\_\_\_\_\_  
(Military time)

---

Was patient intubated a second time?

- No
- Yes

---

Second intubation date (MM/DD/YYYY)

\_\_\_\_\_

---

Second intubation time (24 HH:MM)

\_\_\_\_\_  
(Military time)

---

Where was the patient primarily managed while ventilated?

(Format: If Cornell: G5N, B17 | If LMH: LMH2S, LMH5C |If Queens: Q5W, QMICU)

---

Was the patient extubated a second time?

- No
- Yes

---

Second extubation date (MM/DD/YYYY)

\_\_\_\_\_

---

Second extubation time (24 HH:MM)

\_\_\_\_\_  
(Military time)

---

Were there additional intubations?

- No
- Yes

**ICU Stay**

Admitted to ICU at any point

- No  
 Yes

Date of admission to ICU (MM/DD/YYYY)

---

Time of admission to ICU (24 HH:MM)

---

  
(Military time)

Was the patient discharged from the ICU?

- No  
 Yes

ICU Discharge date (MM/DD/YYYY)

---

ICU Discharge time (24 HH:MM)

---

  
(Military time)

Was patient admitted to the ICU for a second time?

- No  
 Yes  
(After prior admission and discharge from ICU)

Second ICU Date (MM/DD/YYYY)

---

Second ICU admission time (24 HH:MM)

---

  
(Military time)

Was the patient discharged from the ICU a second time?

- No  
 Yes

Second ICU Discharge date (MM/DD/YYYY)

---

Second ICU Discharge time (24 HH:MM)

---

  
(Military time)

Were there additional ICU admissions?

- No  
 Yes

**Discharge**

Did the patient die in the hospital?

- No  
 Yes

Date of death (MM/DD/YYYY)

---



---

Time of death (24 HH:MM)

---

(Military time)

---

Was the patient discharged from the hospital?

- No  
 Yes  
 Transfer to outside hospital (without EMR access)

---

Date of discharge from the hospital (MM/DD/YYYY)

---

---

Time of discharge from the hospital (24 HH:MM)

---

(Military time)

---

Where was the patient discharged to?

- Home  
 Subacute Rehab  
 Acute Rehab  
 Skilled Nursing Facility  
 Hospice  
 Shelter  
 Other

---

Other:

---

---

Date of transfer from the hospital (MM/DD/YYYY)

---

---

Time of transfer from the hospital (24 HH:MM)

---

(Military time)

---

Where was the patient transferred to?

- HSS  
 DHK  
 NYP-Columbia  
 MSKCC  
 NYP-Cornell  
 Other  
(Only mark NYP-Cornell if you are a Queens reviewer)

---

Other:

---

---

## Imaging

What was the QTc (calculated QT) of the first EKG?

---

---

Did the patient receive a chest x-ray?

- No  
 Yes

---

Date of Initial Chest X-Ray (MM/DD/YYYY)

---

---

Initial Chest X-ray Findings

- Clear
- Unilateral Infiltrate
- Bilateral Infiltrates
- Pleural Effusion
- Other

---

Other:

\_\_\_\_\_

---

Did they have a follow-up CXR?

- No
- Yes

---

Date of follow-up CXR (MM/DD/YYYY)

\_\_\_\_\_

---

Follow-up CXR findings

- Not Specified
- Improved
- Stable
- Worse

---

What was the finding on worsening chest X-Ray?

- Clear
- Unilateral Infiltrate
- Bilateral Infiltrates
- Pleural Effusion
- Other

---

Other:

\_\_\_\_\_

---

Did the patient receive a chest CT?

- No
- Yes

---

Chest CT 1 Date (MM/DD/YYYY)

\_\_\_\_\_

---

Chest CT Scan 1 Findings

- Clear
- Ground glass opacities
- Multi-focal or bilateral patchy consolidations/infiltrates
- Local, patchy shadowing
- Interstitial abnormalities
- Bronchial wall thickening
- Centrilobular nodules

---

Did the patient receive a second chest CT?

- No
- Yes

---

Chest CT 2 Date (MM/DD/YYYY)

\_\_\_\_\_

---

How did the second CT compare to the first?

- Unspecified
- Improved
- No Change
- Worse

Chest CT Scan 2 Findings

- Clear  
 Ground glass opacities  
 Multi-focal or bilateral patchy consolidations/infiltrates  
 Local, patchy shadowing  
 Interstitial abnormalities  
 Bronchial wall thickening  
 Centrilobular nodules

**Disposition**

Was the patient admitted?

- No  
 Yes

Date of Admission (MM/DD/YYYY)

\_\_\_\_\_

Time of Admission (24 HH:MM)

\_\_\_\_\_

(Military time)

Where was the patient admitted?

- Floor  
 Step Down  
 ICU

**Complications**

Did the patient develop ARDS?

- No  
 Yes

Was prone positioning performed?

- No  
 Yes

Was mechanical circulatory support required?

- No  
 Yes  
 (Balloon pump, Impella, VV-ECMO, VA-ECMO)

Type of initial mechanical circulatory support used

- Balloon pump  
 Impella  
 VV-ECMO  
 VA-ECMO

Start date of initial mechanical circulatory support (MM/DD/YYYY)

\_\_\_\_\_

Was a second form of mechanical circulatory support used?

- No  
 Yes

Type of second mechanical circulatory support used

- Balloon pump  
 Impella  
 VV-ECMO  
 VA-ECMO

Date that second mechanical circulatory support started (MM/DD/YYYY)

\_\_\_\_\_

Was a third form of mechanical circulatory support used?

- No  
 Yes

Type of third mechanical circulatory support used

- Balloon pump  
 Impella  
 VV-ECMO  
 VA-ECMO

Date that third mechanical circulatory support started (MM/DD/YYYY)

\_\_\_\_\_

Did the patient develop a respiratory coinfection? (as confirmed by microbiology)

- No  
 Yes, bacterial  
 Yes, viral  
 Yes, fungal  
 Yes, unspecified

Did the patient develop a thromboembolic event as confirmed by imaging (CT-PE, ultrasound, etc)?

- No  
 DVT  
 Pulmonary Embolism  
 Arterial thrombosis

What was the location of the arterial thrombosis?

\_\_\_\_\_

Did the patient develop any other complications?

- None  
 Myocardial Infarction  
 Heart failure exacerbation or cardiogenic shock  
 New onset Arrhythmia  
 DIC  
 Rhabdomyolysis  
 Septic Shock  
 Acute Kidney Injury  
 Ventilator-associated Pneumonia  
 Other  
 (Select all that apply)

Other:

\_\_\_\_\_

Was dialysis required at any point?

- No  
 Yes  
 (Search Dialysis, HD, PD, CRRT)

### Testing

Did the patient receive a respiratory pathogen or viral panel?

- No  
 Yes

Was the respiratory pathogen or viral panel positive?

- No  
 Yes

---

What pathogens were positive?

- Adenovirus DNA  
 Coronavirus 229E RNA  
 Coronavirus HKU1 RNA  
 Coronavirus NL63 RNA  
 Coronavirus OC43 RNA  
 Human Metapneumovirus RNA  
 Human Rhinovirus/Enterovirus  
 Influenza A H1 2009 Virus RNA  
 Influenza B Virus RNA  
 Parainfluenza 1 Virus RNA  
 Parainfluenza 2 Virus RNA  
 Parainfluenza 3 Virus RNA  
 Parainfluenza 4 Virus RNA  
 Respiratory Syncytial Virus RNA  
 Bordetella pertussis DNA  
 Chlamydia pneumoniae DNA  
 Mycoplasma pneumoniae DNA  
 Bordetella parapertussis DNA  
 Other

---

Other:

---



---

Did the patient have a blood culture?

- No  
 Yes

---

Did the patient have a positive blood culture?

- No  
 Yes

---

What was the date of the positive blood culture?  
(MM/DD/YYYY)

---



---

What were the pathogen(s)?

---



---

Did the patient have a second positive blood culture sample with a different pathogen?

- No  
 Yes

---

What was the date of the second positive blood culture?

---



---

What were the second pathogen(s)?

---



---

Did the patient have 3 or more positive blood culture samples with a different pathogen?

- No  
 Yes

---

Please list all other pathogens that were found

---



---

Did the patient have a sputum culture?

- No  
 Yes

---

Did the patient have a positive sputum culture?

- No  
 Yes

---

What was the date of the positive sputum culture?  
(MM/DD/YYYY)

---

---

What were the pathogen(s)?

---

---

Did the patient have a second positive sputum sample with a different pathogen?

- No  
 Yes

---

What was the date of the second positive sputum culture?

---

---

What were the second pathogen(s)?

---

---

Did the patient have 3 or more positive sputum samples with a different pathogen?

- No  
 Yes

---

Please list all other pathogens that were found

---

---

Initial COVID Test Result

- Not Tested  
 Negative  
 Positive

---

Initial COVID specimen type

- Nasopharyngeal  
 Sputum  
 Bronchoalveolar lavage  
 Other

---

Other:

---

---

Initial COVID Test Date (MM/DD/YYYY)

---

---

Second COVID Test Result

- Not Tested  
 Negative  
 Positive

---

Second COVID Specimen Type

- Nasopharyngeal  
 Sputum  
 Bronchoalveolar lavage  
 Other

---

Other:

---

---

Second COVID Test Date (MM/DD/YYYY)

---

---

Third COVID Test Result

- Not Tested  
 Negative  
 Positive

---

Third COVID Specimen Type

- Nasopharyngeal  
 Sputum  
 Bronchoalveolar lavage  
 Other

---

 Other:
 

---



---

 Third COVID Test Date (MM/DD/YYYY)
 

---



---

 Fourth COVID Test Result

- Not Tested  
 Negative  
 Positive

---

 Fourth COVID Test Type

- Nasopharyngeal  
 Sputum  
 Bronchoalveolar lavage  
 Other

---

 Other:
 

---



---

 Fourth COVID Test Date (MM/DD/YYYY)
 

---



---

 Fifth COVID Test Result

- Not Tested  
 Negative  
 Positive

---

 Fifth COVID Test Type

- Nasopharyngeal  
 Sputum  
 Bronchoalveolar lavage  
 Other

---

 Other:
 

---



---

 Fifth COVID Test Date (MM/DD/YYYY)
 

---



---

### Inpatient Medications

---

 Was the patient treated with a statin while hospitalized?

- No  
 Yes  
 (Minimum of 2 days)

---

 Did the patient require vasopressors at any point?

- No  
 Yes  
 (Dopamine, Epinephrine, Norepinephrine, Phenylephrine, Vasopressin)

---

 Start date of vasopressors (MM/DD/YYYY)
 

---



---

 Date that vasopressors were permanently stopped and remained off for at least 24 hours

---

(Must be off for at least 24 hours. PLEASE make sure to look at rate and make sure it's not listed as "0.0000" and the correct date is given.)

---

Did the patient require vasopressors again during the hospitalization?

- No  
 Yes  
(If there are rates of "0.0000" for >24 hours, this would count as vasopressors being stopped and started again.)

---

Did the patient require inotropes at any point?

- No  
 Yes  
(Dobutamine, Milrinone)

---

Start date of inotropes (MM/DD/YYYY)

---

---

Date that inotropes were permanently stopped and remained off for at least 24 hours

---

(Must be off for at least 24 hours)

---

Did the patient require inotropes again during the hospitalization?

- No  
 Yes

---

Did the patient receive ACE inhibitors or ARBs?

- No  
 Yes  
(Minimum of 2 days; ACEi: "-pril" | ARB: "-sartan")

---

Start date of ACEi/ARBs (MM/DD/YYYY)

---

---

Stop date of ACEi/ARBs (MM/DD/YYYY)

---

---

Did the patient receive diuretics?

- No  
 Yes  
(Minimum of 2 days; furosemide, bumetanide, torsemide, ethacrynic acid, hctz, chlorthalidone, amiloride, spironolactone, eplerenone, triamterene, etc)

---

Start date of diuretics (MM/DD/YYYY)

---

---

Stop date of diuretics (MM/DD/YYYY)

---

---

Did the patient receive NSAIDs?

- No  
 Yes  
(Minimum of 2 days; aspirin, celecoxib, diclofenac, diflunisal, etodolac, ibuprofen, indomethacin, ketoprofen, ketorolac, meloxicam, nabumetone, naproxen, oxaprozin, piroxicam, salsalate, sulindac, tolmetin)

---

Start date of NSAIDs (MM/DD/YYYY)

---

---

Stop date of NSAIDs (MM/DD/YYYY)

---



Did the patient receive hydroxychloroquine (Plaquenil)?  No  
 Yes

What was the loading dose of hydroxychloroquine (Plaquenil) (mg/day)? \_\_\_\_\_

What was the maintenance dose of hydroxychloroquine (Plaquenil) (mg/day)? \_\_\_\_\_

Start date of hydroxychloroquine (Plaquenil) (MM/DD/YYYY) \_\_\_\_\_

Stop date of hydroxychloroquine (Plaquenil) (MM/DD/YYYY) \_\_\_\_\_  
(If the patient was discharged with instructions to continue Plaquenil, put the last date of the intended course (refer to discharge med rec))

Was the patient discharged with instructions to continue Plaquenil?  No  
 Yes

If Plaquenil was discontinued before regimen completed (less than 5 days), what was the reason:  Physician Discretion  
 Renal toxicity  
 Liver toxicity  
 Prolonged QTc  
 Other

Other: \_\_\_\_\_

Did the patient receive Remdesivir?  No  
 Yes

Start date of Remdesivir (MM/DD/YYYY) \_\_\_\_\_

Stop date of Remdesivir (MM/DD/YYYY) \_\_\_\_\_

Did the patient receive Kaletra (lopinavir/ritonavir)  No  
 Yes

Start date of Kaletra (lopinavir/ritonavir) (MM/DD/YYYY) \_\_\_\_\_

Stop date of Kaletra (lopinavir/ritonavir) (MM/DD/YYYY) \_\_\_\_\_

Was the patient on any other protease inhibitors (excluding their HIV regimen if applicable)  No  
 Yes

Which one? \_\_\_\_\_

Did the patient receive Tamiflu (oseltamavir)?  No  
 Yes

---

Start date of Tamiflu (MM/DD/YYYY)

---

---

Stop date of Tamiflu (MM/DD/YYYY)

---

---

Did the patient require antibiotics for  $\geq$  48hs?

- No  
 Yes  
(Only include antibiotics given as an INPATIENT)

---

Which antibiotics were used for at least 48 hours?

- Ceftriaxone  
 Piperacillin-tazobactam  
 Meropenem  
 Vancomycin  
 Azithromycin  
 Levofloxacin  
 Doxycycline  
 Other

---

Other:

---

---

Did the patient receive steroids?

- No  
 Yes

---

Start date of steroids (MM/DD/YYYY)

---

---

Stop date of steroids (MM/DD/YYYY)

---

---

Did the patient receive IVIG?

- No  
 Yes

---

Start date of IVIG (MM/DD/YYYY)

---

---

Stop date of IVIG (MM/DD/YYYY)

---

---

Did the patient receive interferon beta?

- No  
 Yes

---

Start date of interferon beta (MM/DD/YYYY)

---

---

Stop date of interferon beta (MM/DD/YYYY)

---

---

Did the patient receive tocilizumab (Actemra)?

- No  
 Yes

---

Start date of tocilizumab (MM/DD/YYYY)

---

Stop date of tocilizumab (MM/DD/YYYY)

---

Did the patient receive an sarilumab (Kevzara)?

- No  
 Yes

Start date of sarilumab (MM/DD/YYYY)

---

Stop date of sarilumab (MM/DD/YYYY)

---

Did the patient receive any other COVID-targeted treatments?

(Please refer to latest ID note and list the treatments. Only treatments used to target COVID, not symptomatic treatments (leave blank if none))

### Survey Status

Which ED did the patient present to?

- NYP Cornell  
 NYP Lower Manhattan  
 NYP Queens  
 Brooklyn Methodist  
 NYP Columbia  
 Other

Other:

---

Was the patient transferred to Cornell, LMH, or Queens?

- No  
 Yes, to NYP Cornell  
 Yes, to NYP Queens

When was the patient transferred?

---

Was your patient last hospitalized at Cornell, LMH, or Queens?

- NYP Cornell  
 NYP Lower Manhattan  
 NYP Queens

Was the patient DNR/DNI during this hospitalization?

- No  
 DNR and DNI  
 Do Not Resuscitate (DNR) only  
 Do Not Intubate (DNI) only

Was the patient transferred to Hospital for Special Surgery (HSS) during this hospitalization?

- No  
 Yes

Date of transfer to HSS

---

Was the patient transferred back from HSS?

- No  
 Yes

Date of transfer back from HSS

---

---

Is the patient still hospitalized?

- No
- Yes

---

Calculated Age (years) at time of ED presentation

\_\_\_\_\_

(Please use to confirm DOB)

---

Chart Review Last Updated (MM/DD/YYYY)

\_\_\_\_\_

---

Please leave any questions for further review

\_\_\_\_\_

---

Please save as one of the following: Complete = patient discharged and chart reviewed | Incomplete = patient in hospital and chart reviewed | Unverified = chart requires further review
