# Supplementary material
Source: PubMed Central journal article supplement (PMC8529289)
Supplement: mmc4.pdf [file mmc4.pdf]

| Name               | Contributions to the COVID-19 IDR and Current Manuscript                                                                | Additional contributions not listed or captured: | Conflicts of Interest | Email Address           |
|--------------------|-------------------------------------------------------------------------------------------------------------------------|--------------------------------------------------|-----------------------|-------------------------|
| Andrew L. Yin      | Drafting manuscript, review of manuscript, manual chart abstraction, query development, extraction and analysis of data |                                                  | No                    | aly2011@med.cornell.edu |
| Winston L. Guo     | Drafting manuscript, review of manuscript, query development, extraction and analysis of data                           |                                                  | No                    | wig4004@med.cornell.edu |
| Evan T. Sholle     | Drafting manuscript, review of manuscript, query development, extraction and analysis of data, development of COVID IDR |                                                  | No                    | evs2008@med.cornell.edu |
| Mangala Rajan      | Drafting manuscript, review of manuscript, development of COVID IDR                                                     |                                                  | No                    | mar2834@med.cornell.edu |
| Mark N. Alshak     | Review of manuscript, member of initial REDCap abstraction leadership team                                              |                                                  | No                    | mna2005@med.cornell.edu |
| Justin J. Choi     | Review of manuscript, manual abstraction leader, development of COVID IDR                                               |                                                  | No                    | juc9017@med.cornell.edu |
| Parag Goyal        | Review of manuscript, manual abstraction leader, development of COVID IDR                                               |                                                  | No                    | pag9051@med.cornell.edu |
| Assem Jabri        | Review of manuscript, member of initial REDCap abstraction leadership team                                              |                                                  | no                    | asj2003@med.cornell.edu |
| Han A. Li          | Review of manuscript, member of initial REDCap abstraction leadership team                                              |                                                  | No                    | hal2019@med.cornell.edu |
| Laura C. Pinheiro  | Review of manuscript, member of initial REDCap abstraction leadership team                                              |                                                  | No                    | lcp2003@med.cornell.edu |
| Graham T. Wehmeyer | Review of manuscript, member of initial REDCap abstraction leadership team                                              |                                                  | No                    | gtw2001@med.cornell.edu |
| Mark Weiner        | Review of manuscript, contributed to methods and direction of project                                                   |                                                  | No                    | mgw4001@med.cornell.edu |
| Monika M. Safford  | Review of manuscript, manual abstraction leader, development of COVID IDR                                               |                                                  | No                    | mms9024@med.cornell.edu |

|                                                           |                                                                                                                                                                                                                                                                                                                                                         |  |    |                            |
|-----------------------------------------------------------|---------------------------------------------------------------------------------------------------------------------------------------------------------------------------------------------------------------------------------------------------------------------------------------------------------------------------------------------------------|--|----|----------------------------|
| Thomas R. Campion Jr.                                     | Drafting manuscript, review of manuscript, extraction and analysis of data, development of COVID IDR                                                                                                                                                                                                                                                    |  | No | thc2015@med.cornell.edu    |
| Curtis L. Cole                                            | Drafting manuscript, review of manuscript, development of COVID IDR                                                                                                                                                                                                                                                                                     |  | No | ccole@med.cornell.edu      |
| <b>Weill Cornell COVID-19 Data Abstraction Consortium</b> |                                                                                                                                                                                                                                                                                                                                                         |  |    |                            |
| Alex L. Huang                                             | Data Collection (e.g. manual abstraction/chart review);Participated in discussions about data collection (e.g. Zoom meetings with abstraction leaders discussing survey issues or potential data collection ideas);                                                                                                                                     |  | No | a.huang718@gmail.com       |
| Alice Chung                                               | Data Collection (e.g. manual abstraction/chart review);                                                                                                                                                                                                                                                                                                 |  | No | achung812@gmail.com        |
| Alisha N. Dua                                             | Data Collection (e.g. manual abstraction/chart review);Participated in discussions about data collection (e.g. Zoom meetings with abstraction leaders discussing survey issues or potential data collection ideas);Discussed data quality with the research team (e.g. discussing semantic issues, logistic issues, issues with data in the EMR, etc.); |  | No | and2061@med.cornell.edu    |
| Andrew Cho                                                | Data Collection (e.g. manual abstraction/chart review);                                                                                                                                                                                                                                                                                                 |  | No | andrewc314@gmail.com       |
| Andrew Eidelberg                                          | Data Collection (e.g. manual abstraction/chart review);                                                                                                                                                                                                                                                                                                 |  | No | a.eidelberg512@gmail.com   |
| Anthony F. Blackburn                                      | Data Collection (e.g. manual abstraction/chart review);Participated in discussions about data collection (e.g. Zoom meetings with abstraction leaders discussing survey issues or potential data collection ideas);                                                                                                                                     |  | No | blackburnmd.2021@gmail.com |
| Aretina K. Leung                                          | Data Collection (e.g. manual abstraction/chart review);Participated in discussions about data collection (e.g. Zoom meetings with abstraction leaders discussing survey issues or potential data collection ideas);                                                                                                                                     |  | No | aretinaleung@gmail.com     |
| Ashley Wu                                                 | Data Collection (e.g. manual abstraction/chart review);Participated in discussions about data collection (e.g. Zoom meetings with abstraction leaders discussing survey issues or potential data collection ideas);                                                                                                                                     |  | no | wu.ashley.md@gmail.com     |

|                      |                                                                                                                                                                                                                                                                                                                                                                                                                                             |           |      |                                |
|----------------------|---------------------------------------------------------------------------------------------------------------------------------------------------------------------------------------------------------------------------------------------------------------------------------------------------------------------------------------------------------------------------------------------------------------------------------------------|-----------|------|--------------------------------|
| Bethina Liu          | Data Collection (e.g. manual abstraction/chart review);Participated in discussions about data collection (e.g. Zoom meetings with abstraction leaders discussing survey issues or potential data collection ideas);                                                                                                                                                                                                                         |           | No   | bethina.liu@post.harvard.edu   |
| Brienne C. Lubor     | Data Collection (e.g. manual abstraction/chart review);Participated in discussions about data collection (e.g. Zoom meetings with abstraction leaders discussing survey issues or potential data collection ideas);Discussed data quality with the research team (e.g. discussing semantic issues, logistic issues, issues with data in the EMR, etc.);Taught other students or chart reviewers;Participated in data analysis or synthesis; | See Above | No   | bclubor@gmail.com              |
| Bryan Ang            | Data Collection (e.g. manual abstraction/chart review);Participated in discussions about data collection (e.g. Zoom meetings with abstraction leaders discussing survey issues or potential data collection ideas);                                                                                                                                                                                                                         |           | No   | Bryanang1294@gmail.com         |
| Camila M. Villasante | Data Collection (e.g. manual abstraction/chart review);                                                                                                                                                                                                                                                                                                                                                                                     |           | no   | cav2019@med.cornell.edu        |
| Charalambia Louka    | Data Collection (e.g. manual abstraction/chart review);                                                                                                                                                                                                                                                                                                                                                                                     |           | No   | cl1994@nyu.edu                 |
| Chelsea D. Boydston  | Data Collection (e.g. manual abstraction/chart review);                                                                                                                                                                                                                                                                                                                                                                                     |           | No   | Chelsea.boydstun@gmail.com     |
| Clare A. Burchenal   | Data Collection (e.g. manual abstraction/chart review);                                                                                                                                                                                                                                                                                                                                                                                     |           | No   | Clare.Burchenal@cuanschutz.edu |
| Daniel A. Skaf       | Participated in discussions about data collection (e.g. Zoom meetings with abstraction leaders discussing survey issues or potential data collection ideas);Data Collection (e.g. manual abstraction/chart review);                                                                                                                                                                                                                         |           | No   | dskaf@emory.edu                |
| David L. Chang       | Data Collection (e.g. manual abstraction/chart review);Participated in discussions about data collection (e.g. Zoom meetings discussing survey issues or potential data collection ideas);Discussed data quality with the research team (e.g. discussing semantic issues, logistic issues, issues with data in the EMR, etc.);                                                                                                              |           | no   | davidlchang30@gmail.com        |
| Dianne Lumaquin      | Data Collection (e.g. manual abstraction/chart review);                                                                                                                                                                                                                                                                                                                                                                                     |           | No   | dil2009@med.cornell.edu        |
| Elena Beideck        | Data Collection (e.g. manual abstraction/chart review);                                                                                                                                                                                                                                                                                                                                                                                     |           | None | Elenabeideck@gmail.com         |

|                     |                                                                                                                                                                                                                                                                                                                                                                                                                                              |  |    |                         |
|---------------------|----------------------------------------------------------------------------------------------------------------------------------------------------------------------------------------------------------------------------------------------------------------------------------------------------------------------------------------------------------------------------------------------------------------------------------------------|--|----|-------------------------|
| Emily R. Eruysal    | Data Collection (e.g. manual abstraction/chart review);                                                                                                                                                                                                                                                                                                                                                                                      |  | No | emilyeruysal@gmail.com  |
| Emma Maria Schatoff | Data Collection (e.g. manual abstraction/chart review);Participated in discussions about data collection (e.g. Zoom meetings with abstraction leaders discussing survey issues or potential data collection ideas) ;Discussed data quality with the research team (e.g. discussing semantic issues, logistic issues, issues with data in the EMR, etc.);                                                                                     |  | no | emmaschatoff@gmail.com  |
| Eric T. Caliendo    | Data Collection (e.g. manual abstraction/chart review);Participated in discussions about data collection (e.g. Zoom meetings with abstraction leaders discussing survey issues or potential data collection ideas) ;Discussed data quality with the research team (e.g. discussing semantic issues, logistic issues, issues with data in the EMR, etc.);                                                                                     |  | no | ecalien@emory.edu       |
| Frank R. Chen       | Data Collection (e.g. manual abstraction/chart review);                                                                                                                                                                                                                                                                                                                                                                                      |  | No | frankrxchen@gmail.com   |
| Gal Wald            | Data Collection (e.g. manual abstraction/chart review);Participated in discussions about data collection (e.g. Zoom meetings with abstraction leaders discussing survey issues or potential data collection ideas) ;Discussed data quality with the research team (e.g. discussing semantic issues, logistic issues, issues with data in the EMR, etc.);Participated in data analysis or synthesis;Taught other students or chart reviewers; |  | No | galwald1@gmail.com      |
| Gary F. George      | Data Collection (e.g. manual abstraction/chart review);Participated in discussions about data collection (e.g. Zoom meetings with abstraction leaders discussing survey issues or potential data collection ideas) ;Discussed data quality with the research team (e.g. discussing semantic issues, logistic issues, issues with data in the EMR, etc.);Participated in data analysis or synthesis;Taught other students or chart reviewers; |  | No | gfg2001@med.cornell.edu |

|                    |                                                                                                                                                                                                                                                                                                                                                                                                                   |  |    |                         |
|--------------------|-------------------------------------------------------------------------------------------------------------------------------------------------------------------------------------------------------------------------------------------------------------------------------------------------------------------------------------------------------------------------------------------------------------------|--|----|-------------------------|
| Hao Huang          | Data Collection (e.g. manual abstraction/chart review);Participated in discussions about data collection (e.g. Zoom meetings with abstraction leaders discussing survey issues or potential data collection ideas);                                                                                                                                                                                               |  | No | hah2220@med.cornell.edu |
| Janice Havasy      | Data Collection (e.g. manual abstraction/chart review);Participated in discussions about data collection (e.g. Zoom meetings with abstraction leaders discussing survey issues or potential data collection ideas);                                                                                                                                                                                               |  | No | jah2077@med.cornell.edu |
| Jennifer Huang     | Data Collection (e.g. manual abstraction/chart review);                                                                                                                                                                                                                                                                                                                                                           |  | No | jennihuangmd@gmail.com  |
| Jerry Y. Lee       | Data Collection (e.g. manual abstraction/chart review);Participated in discussions about data collection (e.g. Zoom meetings with abstraction leaders discussing survey issues or potential data collection ideas);Taught other students or chart reviewers;                                                                                                                                                      |  | No | jyl2006@med.cornell.edu |
| Joel Jose Q. Nario | Data Collection (e.g. manual abstraction/chart review);Participated in discussions about data collection (e.g. Zoom meetings with abstraction leaders discussing survey issues or potential data collection ideas);Discussed data quality with the research team (e.g. discussing semantic issues, logistic issues, issues with data in the EMR, etc.);Creating the REDCap form, editing or defining data fields; |  | No | jjqnario@gmail.com      |

|                      |                                                                                                                                                                                                                                                                                                                                                          |                                                                                                                                                                      |    |                             |
|----------------------|----------------------------------------------------------------------------------------------------------------------------------------------------------------------------------------------------------------------------------------------------------------------------------------------------------------------------------------------------------|----------------------------------------------------------------------------------------------------------------------------------------------------------------------|----|-----------------------------|
|                      |                                                                                                                                                                                                                                                                                                                                                          | I helped Han, Graham, and Mark off the record with trouble shooting some of the logistical issues of the chart abstraction effort, especially towards the beginning. |    |                             |
| John K. Chae         | Data Collection (e.g. manual abstraction/chart review);Discussed data quality with the research team (e.g. discussing semantic issues, logistic issues, issues with data in the EMR, etc.);                                                                                                                                                              |                                                                                                                                                                      | No | jkc2005@med.cornell.edu     |
| Joshua Bliss         | Data Collection (e.g. manual abstraction/chart review);                                                                                                                                                                                                                                                                                                  |                                                                                                                                                                      | No | Bliss.j@outlook.com         |
| Kenny Chen           | Data Collection (e.g. manual abstraction/chart review);                                                                                                                                                                                                                                                                                                  |                                                                                                                                                                      | No | kechen@maimonidesmed.org    |
| Kimberly A. Bogardus | Data Collection (e.g. manual abstraction/chart review);                                                                                                                                                                                                                                                                                                  |                                                                                                                                                                      | no | kimberlybogardus1@gmail.com |
| Kimberly N. Forlenza | Data Collection (e.g. manual abstraction/chart review);                                                                                                                                                                                                                                                                                                  |                                                                                                                                                                      | no | forlenza@uchc.edu           |
| Leora Haber          | Data Collection (e.g. manual abstraction/chart review);                                                                                                                                                                                                                                                                                                  |                                                                                                                                                                      | No | Leorahaber@gmail.com        |
| Lisa Zhang           | Participated in discussions about data collection (e.g. Zoom meetings with abstraction leaders discussing survey issues or potential data collection ideas) ;Data Collection (e.g. manual abstraction/chart review);Discussed data quality with the research team (e.g. discussing semantic issues, logistic issues, issues with data in the EMR, etc.); |                                                                                                                                                                      | No | liz4002@med.cornell.edu     |
| Mahmoud Eljalby      | Data Collection (e.g. manual abstraction/chart review);Participated in discussions about data collection (e.g. Zoom meetings with abstraction leaders discussing survey issues or potential data collection ideas) ;Discussed data quality with the research team (e.g. discussing semantic issues, logistic issues, issues with data in the EMR, etc.); |                                                                                                                                                                      | No | meljalby@gmail.com          |

|                       |                                                                                                                                                                                                                                                                                                                                                          |                              |      |                                     |
|-----------------------|----------------------------------------------------------------------------------------------------------------------------------------------------------------------------------------------------------------------------------------------------------------------------------------------------------------------------------------------------------|------------------------------|------|-------------------------------------|
| Marcos A. Davila III  | Participated in data analysis or synthesis;                                                                                                                                                                                                                                                                                                              | Assisted in creating the IDR | no   | mzd2016@med.cornell.edu             |
| Matthew L. Magruder   | Data Collection (e.g. manual abstraction/chart review);                                                                                                                                                                                                                                                                                                  |                              | No   | mmagruder@maimonidesmed.org         |
| Max F. Morin          | Data Collection (e.g. manual abstraction/chart review);                                                                                                                                                                                                                                                                                                  |                              | No   | max.f.morin@gmail.com               |
| Mitali Kini           | Data Collection (e.g. manual abstraction/chart review);Participated in discussions about data collection (e.g. Zoom meetings with abstraction leaders discussing survey issues or potential data collection ideas) ;Taught other students or chart reviewers;                                                                                            |                              | no   | Mitali.kini@northwestern.edu        |
| Orrin S. Belden       | Data Collection (e.g. manual abstraction/chart review);                                                                                                                                                                                                                                                                                                  |                              | no   | Orrin.Belden@mountsinai.org         |
| Pooja D. Shah         | Data Collection (e.g. manual abstraction/chart review);Participated in discussions about data collection (e.g. Zoom meetings with abstraction leaders discussing survey issues or potential data collection ideas) ;Discussed data quality with the research team (e.g. discussing semantic issues, logistic issues, issues with data in the EMR, etc.); |                              | None | poojadimpleshah@gmail.com           |
| Prithvi M. Mohan      | Data Collection (e.g. manual abstraction/chart review);Participated in discussions about data collection (e.g. Zoom meetings with abstraction leaders discussing survey issues or potential data collection ideas) ;                                                                                                                                     |                              | No   | Pmmohan95@gmail.com                 |
| Rachel L. Friedlander | Data Collection (e.g. manual abstraction/chart review);                                                                                                                                                                                                                                                                                                  |                              | no   | Rachel.friedlander@northwestern.edu |
| Rahmi S. Elahjji      | Data Collection (e.g. manual abstraction/chart review);Participated in discussions about data collection (e.g. Zoom meetings with abstraction leaders discussing survey issues or potential data collection ideas) ;Discussed data quality with the research team (e.g. discussing semantic issues, logistic issues, issues with data in the EMR, etc.); |                              | no   | rahmi.elahjji@gmail.com             |

|                    |                                                                                                                                                                                                                                                                                                                                                          |  |    |                           |
|--------------------|----------------------------------------------------------------------------------------------------------------------------------------------------------------------------------------------------------------------------------------------------------------------------------------------------------------------------------------------------------|--|----|---------------------------|
| Rana K. Fowlkes    | Data Collection (e.g. manual abstraction/chart review);Participated in discussions about data collection (e.g. Zoom meetings with abstraction leaders discussing survey issues or potential data collection ideas) ;Discussed data quality with the research team (e.g. discussing semantic issues, logistic issues, issues with data in the EMR, etc.); |  | No | Ranafowlkes@gmail.com     |
| Rohini V. Kopparam | Data Collection (e.g. manual abstraction/chart review);Participated in discussions about data collection (e.g. Zoom meetings with abstraction leaders discussing survey issues or potential data collection ideas) ;                                                                                                                                     |  | No | rohini.kopparam@gmail.com |
| Ruth Moges         | Data Collection (e.g. manual abstraction/chart review);                                                                                                                                                                                                                                                                                                  |  | No | ruthmoges@gmail.com       |
| Sachin P. Shah     | Data Collection (e.g. manual abstraction/chart review);Participated in discussions about data collection (e.g. Zoom meetings with abstraction leaders discussing survey issues or potential data collection ideas) ;Discussed data quality with the research team (e.g. discussing semantic issues, logistic issues, issues with data in the EMR, etc.); |  | No | sps4001@med.cornell.edu   |
| Samuel C. Williams | Data Collection (e.g. manual abstraction/chart review);Participated in discussions about data collection (e.g. Zoom meetings with abstraction leaders discussing survey issues or potential data collection ideas) ;Discussed data quality with the research team (e.g. discussing semantic issues, logistic issues, issues with data in the EMR, etc.); |  | No | scw2008@med.cornell.edu   |
| Shannon M. Glynn   | Data Collection (e.g. manual abstraction/chart review);Participated in discussions about data collection (e.g. Zoom meetings with abstraction leaders discussing survey issues or potential data collection ideas) ;                                                                                                                                     |  | no | smglynn2021@gmail.com     |
| Sonia Iosim        | Data Collection (e.g. manual abstraction/chart review);                                                                                                                                                                                                                                                                                                  |  | No | sonia.iosim@gmail.com     |
| Sophie Mou         | Data Collection (e.g. manual abstraction/chart review);                                                                                                                                                                                                                                                                                                  |  | No | sophie.mou.sm@gmail.com   |



|             |                                                                                                                                                                                                                                                                                                                                             |  |    |                         |
|-------------|---------------------------------------------------------------------------------------------------------------------------------------------------------------------------------------------------------------------------------------------------------------------------------------------------------------------------------------------|--|----|-------------------------|
| Xiaobo Fuld | Discussed data quality with the research team (e.g. discussing semantic issues, logistic issues, issues with data in the EMR, etc.);Participated in data analysis or synthesis;Participated in discussions about data collection (e.g. Zoom meetings with abstraction leaders discussing survey issues or potential data collection ideas); |  | No | xif2005@med.cornell.edu |
| Yuna Oh     | Data Collection (e.g. manual abstraction/chart review);                                                                                                                                                                                                                                                                                     |  | No | yno2001@med.cornell.edu |
| Zara Adamou | Data Collection (e.g. manual abstraction/chart review);Participated in discussions about data collection (e.g. Zoom meetings with abstraction leaders discussing survey issues or potential data collection ideas);                                                                                                                         |  | no | zaa2011@med.cornell.edu |
